# Supplementary material for: Zinc Chelation Mediates the Lysosomal Disruption without Intracellular ROS Generation
Source: Hindawi journal article supplement (doi:10.1155/2016/6724585), 2016-01-01
Supplement: f1 [file 6724585.f1.pdf]

## Supporting Information

### Figure 1A: Viability of human SH-SY5Y neuroblastoma cells with TPEN treatment.

#### 1A: Viability by MTT method

Cells treated with TPEN and incubated for 12 hours.

|        | Control | 5 $\mu$ M | 10 $\mu$ M | 25 $\mu$ M | 50 $\mu$ M | 100 $\mu$ M |
|--------|---------|-----------|------------|------------|------------|-------------|
| OD - 1 | 0.324   | 0.272     | 0.198      | 0.149      | 0.159      | 0.165       |
| OD - 2 | 0.392   | 0.317     | 0.295      | 0.211      | 0.184      | 0.132       |
| OD - 3 | 0.405   | 0.332     | 0.308      | 0.198      | 0.166      | 0.207       |
| OD - 4 | 0.426   | 0.317     | 0.267      | 0.257      | 0.258      | 0.203       |
| OD - 5 | 0.441   | 0.318     | 0.321      | 0.281      | 0.282      | 0.161       |

$$\text{Viability of each independent experiment} = \frac{OD_{\text{treated}}}{OD_{\text{control}}} \times 100$$

|            | Control | 5 $\mu$ M  | 10 $\mu$ M | 25 $\mu$ M | 50 $\mu$ M | 100 $\mu$ M |
|------------|---------|------------|------------|------------|------------|-------------|
| V.1        | 100     | 83.95062   | 61.11111   | 45.98765   | 49.07407   | 50.92593    |
| V.2        | 100     | 80.86735   | 75.2551    | 53.82653   | 46.93878   | 33.67347    |
| V.3        | 100     | 81.97531   | 76.04938   | 48.88889   | 40.98765   | 51.11111    |
| V.4        | 100     | 74.41315   | 62.67606   | 60.32864   | 60.56338   | 47.65258    |
| V.5        | 100     | 72.10884   | 72.78912   | 63.71882   | 63.94558   | 36.50794    |
| Mean       | 100     | 78.66305   | 69.57615   | 54.55011   | 52.30189   | 43.97421    |
| SD         |         | 5.118781   | 7.136956   | 7.472371   | 9.630958   | 8.286173    |
| ANOVA Test |         | 1.43148E-5 | 1.21256E-5 | 8.2134E-7  | 3.94307E-6 | 3.62466E-7  |

Cells treated with TPEN and incubated for 24 hours.

|        | Control | 5 $\mu$ M | 10 $\mu$ M | 25 $\mu$ M | 50 $\mu$ M | 100 $\mu$ M |
|--------|---------|-----------|------------|------------|------------|-------------|
| OD - 1 | 0.451   | 0.271     | 0.277      | 0.071      | 0.189      | 0.201       |
| OD - 2 | 0.805   | 0.404     | 0.278      | 0.106      | 0.234      | 0.215       |
| OD - 3 | 0.571   | 0.381     | 0.279      | 0.092      | 0.197      | 0.219       |
| OD - 4 | 0.333   | 0.131     | 0.198      | 0.098      | 0.163      | 0.195       |
| OD - 5 | 0.825   | 0.345     | 0.247      | 0.167      | 0.248      | 0.177       |

$$\text{Viability of each independent experiment} = \frac{OD_{\text{treated}}}{OD_{\text{control}}} \times 100$$

| Control | 5 $\mu$ M | 10 $\mu$ M | 25 $\mu$ M | 50 $\mu$ M | 100 $\mu$ M |
|---------|-----------|------------|------------|------------|-------------|
|---------|-----------|------------|------------|------------|-------------|

|            |     |                       |                       |                       |                       |                       |
|------------|-----|-----------------------|-----------------------|-----------------------|-----------------------|-----------------------|
| V.1        | 100 | 60.08869              | 61.41907              | 15.74279              | 41.90687              | 44.56763              |
| V.2        | 100 | 50.18634              | 34.53416              | 13.1677               | 29.06832              | 26.70807              |
| V.3        | 100 | 66.72504              | 48.86165              | 16.11208              | 34.50088              | 38.35377              |
| V.4        | 100 | 39.33934              | 59.45946              | 29.42943              | 48.94895              | 58.55856              |
| V.5        | 100 | 41.81818              | 29.93939              | 20.24242              | 30.06061              | 21.45455              |
| Mean       | 100 | 51.63152              | 46.84275              | 18.93889              | 36.89713              | 37.92851              |
| SD         | 0   | 11.71352              | 14.25615              | 6.388722              | 8.427844              | 14.72368              |
| ANOVA Test |     | 1.53x10 <sup>-5</sup> | 3.24x10 <sup>-5</sup> | 2.57x10 <sup>-9</sup> | 1.64x10 <sup>-7</sup> | 1.32x10 <sup>-5</sup> |

Cells treated with TPEN and incubated for 48 hours.

|        | Control | 5 µM  | 10 µM | 25 µM | 50 µM | 100 µM |
|--------|---------|-------|-------|-------|-------|--------|
| OD - 1 | 0.649   | 0.742 | 0.312 | 0.201 | 0.15  | 0.119  |
| OD - 2 | 0.641   | 0.725 | 0.282 | 0.169 | 0.14  | 0.11   |
| OD - 3 | 0.641   | 0.766 | 0.334 | 0.233 | 0.179 | 0.151  |
| OD - 4 | 0.635   | 0.695 | 0.354 | 0.217 | 0.175 | 0.125  |
| OD - 5 | 0.685   | 0.685 | 0.426 | 0.201 | 0.191 | 0.127  |

$$\text{Viability of each independent experiment} = \frac{OD_{\text{treated}}}{OD_{\text{control}}} \times 100$$

|            | Control | 5 µM     | 10 µM                 | 25 µM                  | 50 µM                  | 100 µM                 |
|------------|---------|----------|-----------------------|------------------------|------------------------|------------------------|
| V.1        | 100     | 114.3297 | 48.07396              | 30.97072               | 23.11248               | 18.3359                |
| V.2        | 100     | 113.1045 | 43.99376              | 26.36505               | 21.84087               | 17.16069               |
| V.3        | 100     | 119.5008 | 52.10608              | 36.34945               | 27.92512               | 23.55694               |
| V.4        | 100     | 109.4488 | 55.74803              | 34.17323               | 27.55906               | 19.68504               |
| V.5        | 100     | 100      | 62.18978              | 29.34307               | 27.88321               | 18.54015               |
| Mean       | 100     | 111.2768 | 52.42232              | 31.44031               | 25.66415               | 19.45574               |
| SD         |         | 7.259521 | 7.009146              | 3.93528                | 2.947683               | 2.461304               |
| ANOVA Test |         | 0.0084   | 3.52x10 <sup>-7</sup> | 2.07x10 <sup>-10</sup> | 1.09x10 <sup>-11</sup> | 1.36x10 <sup>-12</sup> |
